# Supplementary material for: Structural basis for UFM1 transfer from UBA5 to UFC1
Source: PubMed Central journal article supplement (PMC8481289; doi:10.1038/s41467-021-25994-6), 2021-09-29
Supplement: 41467_2021_25994_MOESM1_ESM.pdf [file 41467_2021_25994_MOESM1_ESM.pdf]

## Supplementary information

### Structural basis for UFM1 transfer from UBA5 to UFC1

Manoj Kumar<sup>1</sup>, Prasanth Padala<sup>1†</sup>, Jamal Fahoum<sup>1</sup>, Fouad Hassouna<sup>1</sup>, Tomer Tsaban<sup>2</sup> Guy Zoltsman<sup>3</sup>, Sayanika Banerjee<sup>1</sup>, Einav Cohen-Kfir<sup>1</sup>, Moshe Dessau<sup>4</sup>, Rina Rosenzweig<sup>3</sup>, Michail N. Isupov<sup>5</sup>, Ora Schueler-Furman<sup>2</sup> and Reuven Wiener<sup>1\*</sup>

<sup>1</sup>Department of Biochemistry and Molecular Biology, The Institute for Medical Research Israel-Canada, Hebrew University-Hadassah Medical School, Jerusalem 91120, Israel

<sup>2</sup>Department of Microbiology and Molecular Genetics, Institute for Medical Research Israel-Canada, Faculty of Medicine, the Hebrew University of Jerusalem 91120, Israel

<sup>3</sup>Department of Structural Biology, Weizmann Institute of Sciences, Rehovot, Israel

<sup>4</sup>Azrieli Faculty of Medicine, Bar-Ilan University, Safed 1311502, Israel.

<sup>5</sup>The Henry Wellcome Building for Biocatalysis, Biosciences, University of Exeter, Stocker Road, Exeter, EX4 4QD, United Kingdom

<sup>†</sup>Present address: Department of Biochemistry, School of Biomedical Sciences, University of Otago, Dunedin 9054, New Zealand

\*Corresponding author: Reuven Wiener ([reuvenw@ekmd.huji.ac.il](mailto:reuvenw@ekmd.huji.ac.il))

### Supplementary information Inventory:

Supplementary Tables 1-4

Supplementary Figures 1-9

**Supplementary Table 1: Data collection and Refinement statistics of crystal structures**

| Structure                                                | UFC1-UBA5 (389-404)                                | UBA5 (347-404)-UFC 1          | UFC1 Y110A&F121A                                     |
|----------------------------------------------------------|----------------------------------------------------|-------------------------------|------------------------------------------------------|
| Beamline                                                 | ESRF ID23                                          | BESSY II BL14.1               | XtalLab Pro (Rigaku) Pilatus 200K detector (Dectris) |
| Wavelength (Å)                                           | 0.9720                                             | 0.9763                        | 1.54                                                 |
| Space group                                              | P2 <sub>1</sub> 2 <sub>1</sub> 2 <sub>1</sub>      | P6 <sub>4</sub>               | P 4 <sub>1</sub> 2 <sub>1</sub> 2                    |
| Unit Cell a, b, c (Å), $\alpha$ , $\beta$ , $\gamma$ (°) | 47.1, 67.2, 133.8, 90, 90, 90                      | 84.6, 84.6, 60.8, 90, 90, 120 | 46.16 46.16 143.76 90 90 90                          |
| Resolution range (Å) <sup>a</sup>                        | 33.71 – 2.40 <sup>b</sup> (2.47-2.40) <sup>b</sup> | 46.78-2.65 (2.78-2.65)        | 33.24 - 2.20 (2.28 - 2.20)                           |
| Total reflections <sup>a</sup>                           | 297,196 (14,591) <sup>b</sup>                      | 149,370 (20,269)              | 10,416 (917)                                         |
| Unique reflections <sup>a</sup>                          | 14,084 (704) <sup>b</sup>                          | 7,314 (953)                   | 8,488 (804)                                          |
| Completeness spherical (%) <sup>a</sup>                  | 81.3 (49.4) <sup>b</sup>                           | 100.0 (100.0)                 | 99.82 (99.14)                                        |
| Multiplicity <sup>a</sup>                                | 21.1 (20.7)                                        | 20.4 (21.4)                   | 1.2 (1.1)                                            |
| R <sub>meas</sub> (%) <sup>a,c</sup>                     | 13.6 (142.9) <sup>b</sup>                          | 11.2 (600.2)                  | 15.3 (71.9)                                          |
| $\langle  I /\langle \sigma(I) \rangle$ <sup>a</sup>     | 16.9 (2.5) <sup>b</sup>                            | 13.1 (0.6)                    | 13.3 (2.2)                                           |
| CC <sub>1/2</sub> <sup>a,d</sup>                         | 0.999 (0.868) <sup>b</sup>                         | 0.990 (0.292)                 | 0.99 (0.47)                                          |
| Wilson B-factor <sup>e</sup> (Å <sup>2</sup> )           | 52.1 <sup>b</sup>                                  | 127.1                         | 25.44                                                |
| Refinement statistics                                    |                                                    |                               |                                                      |
| R <sub>work</sub>                                        | 0.219                                              | 0.219                         | 0.205                                                |
| R <sub>free</sub>                                        | 0.288                                              | 0.264                         | 0.256                                                |
| No. of protein monomers in a.u                           | 2                                                  | 1                             | 1                                                    |
| Number of atoms                                          |                                                    |                               |                                                      |
| Macromolecules                                           | 3,000                                              | 1,488                         | 1,316                                                |
| Solvent                                                  | 52                                                 | -                             | 59                                                   |
| Number of protein residues                               | 354                                                | 183                           | 164                                                  |
| RMS bond lengths (Å)                                     | 0.007                                              | 0.004                         | 0.013                                                |
| RMS bond angles (°)                                      | 1.59                                               | 1.45                          | 1.82                                                 |
| Ramachandran favored (%) <sup>f</sup>                    | 95.7                                               | 86.7                          | 97.5                                                 |
| Ramachandran allowed (%)                                 | 4                                                  | 13.3                          | 2.5                                                  |
| Ramachandran outliers (%) <sup>f</sup>                   | 0.3                                                | 0.0                           | 0.0                                                  |
| Clashscore <sup>f</sup>                                  | 8.9                                                | 21.2                          | 10.23                                                |
| Average B-factor protein (Å <sup>2</sup> )               | 60.1                                               | 157.1                         | 28.77                                                |
| Average B-factor solvent (Å <sup>2</sup> )               | 40.6                                               | -                             | 33.38                                                |

<sup>a</sup>Values for the highest resolution shell are given in parentheses

<sup>b</sup>Values are given for data subjected to anisotropic ellipsoidal truncation using the STARANISO server<sup>1</sup>

<sup>c</sup> $R_{meas} = \sum_h [m/(m-1)]^{1/2} \sum_i |I_{h,i} - \langle I_h \rangle| / \sum_h \sum_i I_{h,i}$

<sup>d</sup>CC<sub>1/2</sub> is defined in <sup>2</sup>

<sup>e</sup>Wilson B-factor was estimated by SFCHECK<sup>3</sup>.

<sup>f</sup>The Ramachandran statistics and clashscore statistics were calculated using MOLPROBITY.



**Supplementary Table 3: predicted pKa and buried surface area ( BSA) of the active site cysteine in E2 proteins**

| <b>Protein</b> | <b>PDB code</b> | <b>Catalytic Cysteine</b> | <b>BSA</b> | <b>pKa</b> |
|----------------|-----------------|---------------------------|------------|------------|
| UFC1           | 2Z6P            | 116                       | 4%         | 8.51       |
| UBC9           | 1U9A            | 93                        | 36%        | 11.28      |
| UBCH5C         | 1X23            | 85                        | 26%        | 11.33      |
| UBC12          | 1Y8X            | 111                       | 31%        | 10.91      |
| UBCH7          | 4Q5H            | 86                        | 18%        | 9.57       |
| UBCH5B         | 3TGD            | 85                        | 23%        | 11.13      |
| UBC13          | 1JBB            | 87                        | 16%        | 9.86       |
| UBCH5A         | 2C4P            | 85                        | 37%        | 10.79      |
| UBCH10         | 4YII            | 114                       | 17%        | 9.13       |
| UBE2K          | 1YLA            | 92                        | 24%        | 10.27      |
| UBCH6          | 5LBN            | 131                       | 21%        | 10.25      |
| RAD6B          | 2YBF            | 88                        | 23%        | 9.25       |
| UBE2F          | 3FN1            | 116                       | 37%        | 9.49       |
| UBC7           | 2CYX            | 89                        | 49%        | 9.47       |
| UBE2H          | 2Z5D            | 106                       | 19%        | 9.02       |
| UBE2S          | 5BNB            | 95                        | 30%        | 9.28       |
| UBE2T          | 1YH2            | 86                        | 31%        | 9.77       |
| UBE2U          | 1YRV            | 89                        | 31%        | 10.44      |
| E2E2           | 1Y6L            | 85                        | 22%        | 9.56       |
| UBCH8          | 1WZV            | 85                        | 18%        | 9.63       |
| UBC1           | 2AAK            | 88                        | 15%        | 9.47       |
| RAD6A          | 6CYO            | 88                        | 22%        | 9.86       |
| CDC34          | 3RZ3            | 93                        | 31%        | 10.01      |
| ATG3           | 2DYT            | 234                       | 35%        | 10.29      |

**Supplementary Table 4: Cavity volume in selected E2 proteins**

| <b>Protein</b>       | <b>Volume (Å<sup>3</sup>)</b> | <b>Residues defining the cavity</b>                                                             |
|----------------------|-------------------------------|-------------------------------------------------------------------------------------------------|
| UFC1-2Z6P            | 377                           | T93, A94, P95, E96, I97, Y110, K114, I115, C116, L117, T118, D119, F121, K122, L137, G141, L142 |
| UFC1 Y110A and F121A | 126                           | P95, E96, I97, I115, I117, K122, L137                                                           |
| UBC13-1JBB           | 163.1                         | P67, K68, V69, R85, I86, L91, K92                                                               |
| UBC12-1Y8X           | 110.4                         | P91, K92, V93, K94, V110, L115, R116                                                            |
| UBC9-1U9A            | No proper cavity;<br>16.6     | V92, C93, L94, L97, E98                                                                         |
| UBCH5B-3TGD          | No cavity                     |                                                                                                 |
| UBCH57-4Q5H          | 66.1                          | K67, I68, Q84, V85                                                                              |
| UBCH5C-1X23          | No cavity                     |                                                                                                 |
| E2E2-1Y6L            | No cavity                     |                                                                                                 |
| UBCH8-1WZV           | No cavity                     |                                                                                                 |
| UBC1-2AAK            | No cavity                     |                                                                                                 |
| RAD6A-6CYO           | No proper cavity:<br>5.0      | P68, T69, L92, Q93                                                                              |
| UBCH5A-2C4P          | No cavity                     |                                                                                                 |
| UBCH10-4YII          | No cavity                     |                                                                                                 |
| UBE2K-1YLA           | No cavity                     |                                                                                                 |
| UBCH6-5LBN           | No cavity                     |                                                                                                 |
| RAD6B-2YBF           | 163.8                         | K66, P67, P68, T69, V70, R71, S86, I87, L92, Q93                                                |
| UBE2F-3FN1           | 89.1                          | P95, P96, K97, V98, E114, I115, L120                                                            |
| UBC7-2CYX            | 96.3                          | P69, K70, M71, Y83, R87, V88, C89, L93, H94                                                     |
| UBE2H-2Z5D           | 98.2                          | R73, D75, S86, I87, G88, M90, S102, T104                                                        |
| UBE2S-5BNB           | 198.1                         | L64, P74, P75, K76, G77, E93, I94, C95, V96, L99, K100, V112, I116                              |
| UBE2T-1YH2           | No cavity                     |                                                                                                 |
| UBE2U-1YRV           | 82.8                          | P68, V69, V70, Q87, P88, L93, D94                                                               |
| CDC34-3RZ3           | No proper cavity:<br>6.8      | V92, I94, L97                                                                                   |

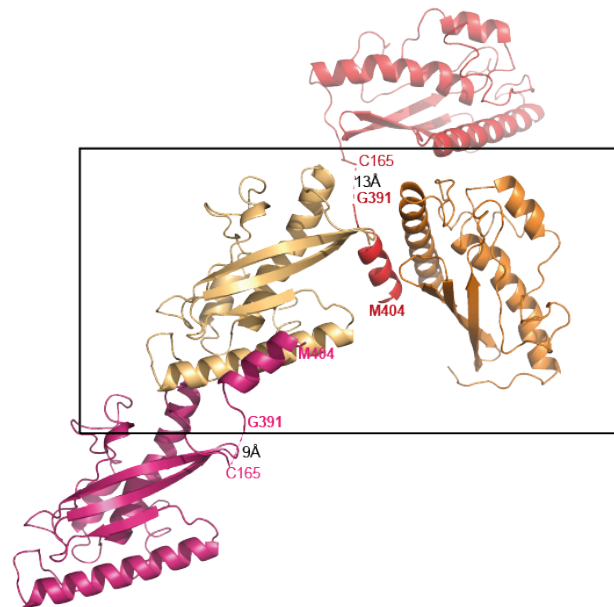

**Supplementary Figure 1: The composition of the UFC1-UBS asymmetric unit.** The asymmetric unit (black rectangle) comprises two molecules of UFC1 (orange and light orange) and two molecules of UBS (red and magenta). The UBS molecules shown in the asymmetric unit are fused to UFC1 molecules that arrive from other asymmetric units. The first two residues of UBS (D389 and S390) and the last two residues of UFC1 (N166 and Q167) were not modeled due to the absence of electron density. The first and last seen residues of UBS are shown in bold while the last seen residues of UFC1 is shown in regular font. The first and last seen residues of UBS and UFC1, respectively, are connected by dotted line and the distance shown could be spanned by the missing residues.

**A**

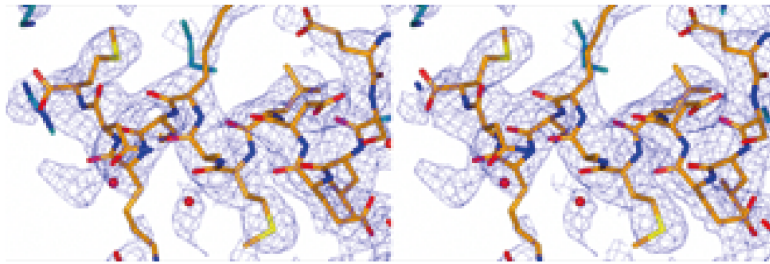

**B**

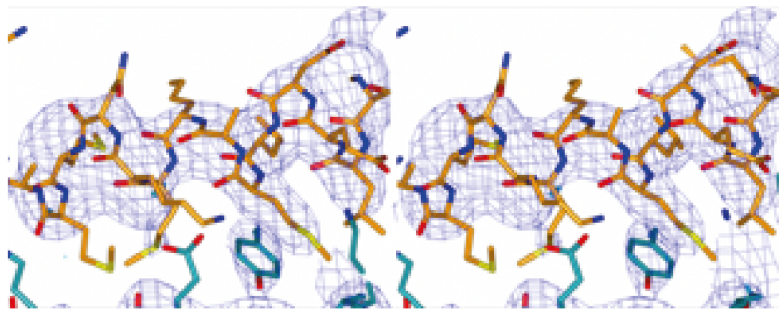

**Supplementary Figure 2: Stereographic representations of the UBS helical region with a composite OMIT electron density map contoured at 1  $\sigma$ .** The map coefficients were calculated using Phenix<sup>4</sup> and the figure was prepared using CCP4mg software<sup>5</sup>. **A.** In the UFC1-UBS structure, the UBS region and its partner UFC1 region are shown as stick models with carbon atoms in orange and cyan, respectively. **B.** In the UBA5(347-404)-UFC1 structure the UBS region and the binding region of the crystallographically related UFC1 are shown as stick models with carbon atoms in orange and cyan, respectively.

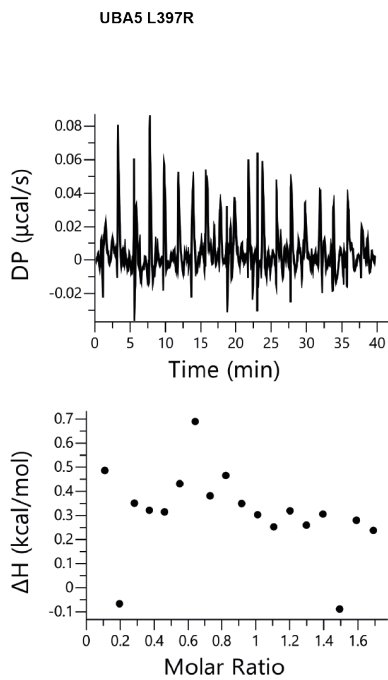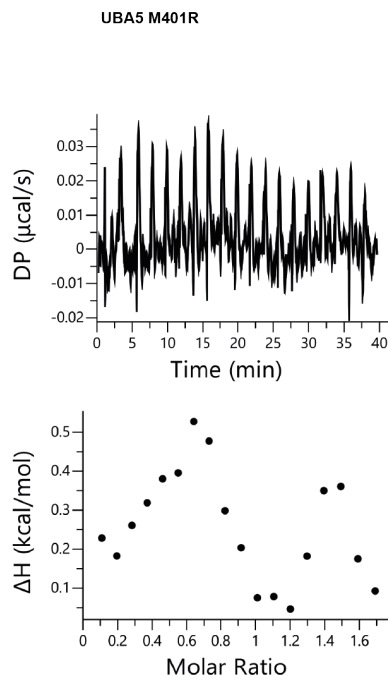

**Supplementary Figure 3: Mutations in UBS prevent binding to UFC1.** ITC experiment showing no binding affinity between UFC1 and indicated UBA5 mutations. Top graph represents raw data of heat flow versus time. The area under the peaks of the upper panel was integrated and plotted as kcal per mole of UFC1 as a function of binding stoichiometry in the bottom panel. Graph represents the enthalpy change versus the molar ratio of UFC1 to UBA5 mutants. Both graphs show no binding of UFC1 to the above mutants.



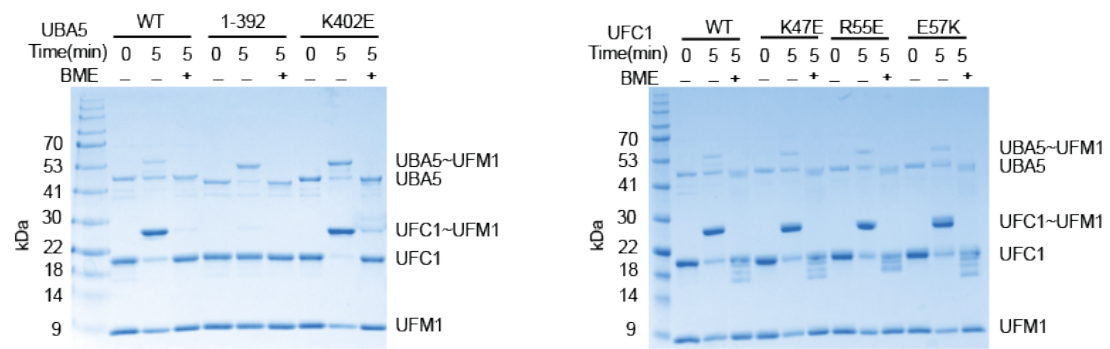

**Supplementary Figure 4:** Mutations in the indicated charged residues of UFC1 or UBS hardly affect UFM1 transfer. SDS-PAGE analysis showing the charging of UFC1 WT or mutant with WT or the indicated UBA5 mutants. The gels are representative of two independent experiments. Source data are provided as a source data file.

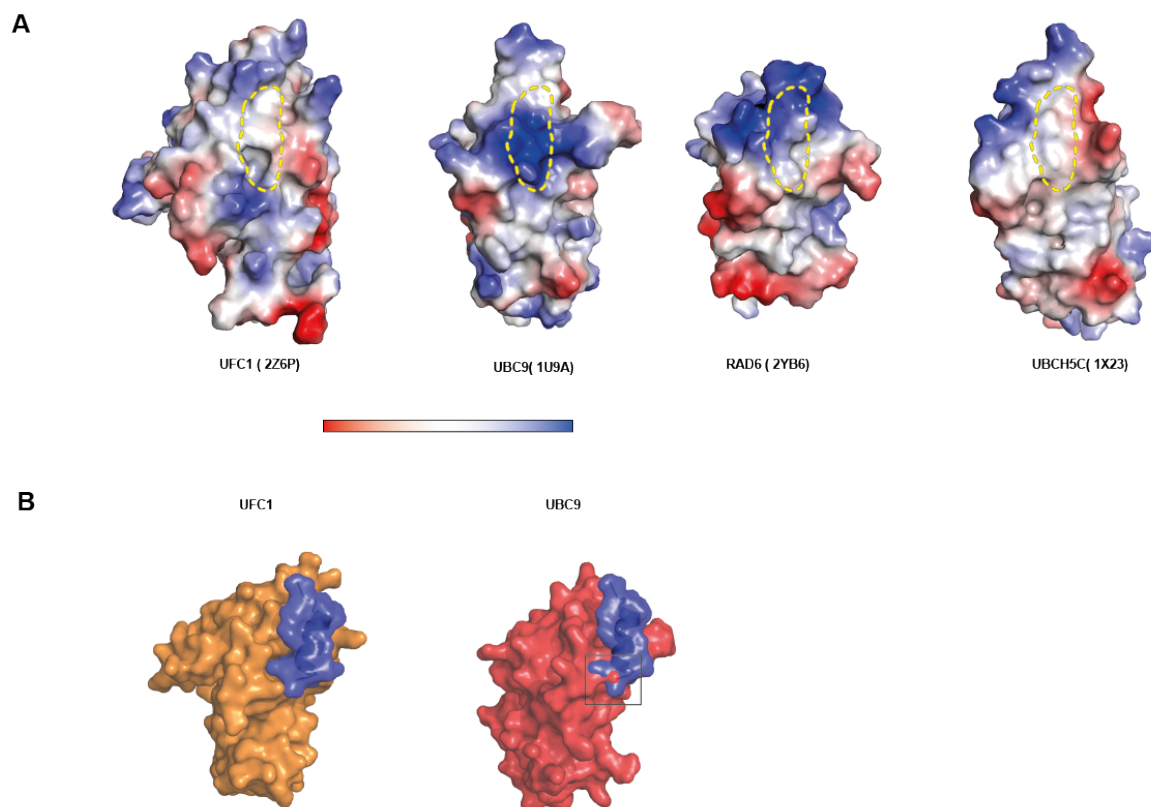

**Supplementary Figure 5: The surface for UBS binding is unique to UFC1. A.** A comparison between electrostatic potential surfaces of indicated E2 enzymes. Yellow dotted line corresponds to the border of UFC1 surface that binds the UBS and the corresponding surface in other E2 proteins. **B.** Clashes of UBS (blue) with UBC9 (red) surface (indicated with black box) but not with UFC1(orange) surface.

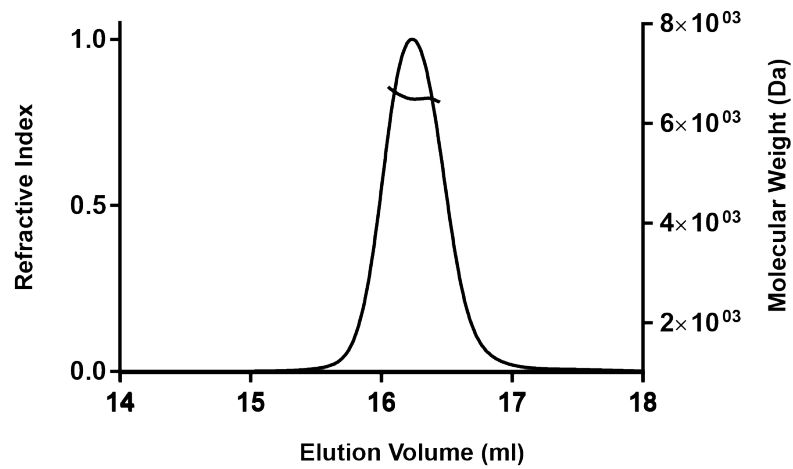

**Supplementary Figure 6: Size exclusion chromatography with multi-angle light scattering analysis of UBA5 (347-404) fragment.** Protein was loaded on an analytical SEC column (Superdex 75 10/300 GL) equilibrated with a buffer containing 20 mM Tris (pH 7.5), 50 mM NaCl. Molecular mass within the chromatographic peak was calculated using ASTRA software, version 7 (Wyatt Technologies). The measured molecular weight of 6.6 kDa fits the expected molecular weight of this fragment (6.4 kDa). Source data are provided as a source data file.

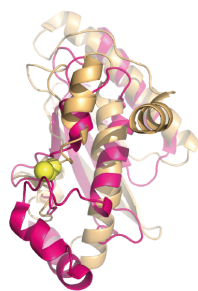

UBCH10 (4yii)

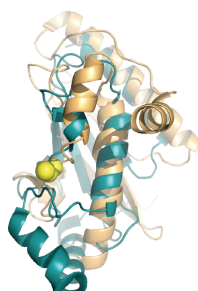

UBCH7 (4q5e)

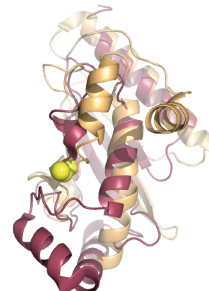

UBCH5B (3tgd)

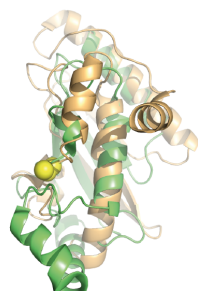

E2E2 (1y6l)

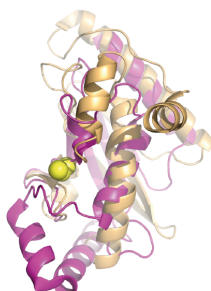

UBC9 (5f6e)

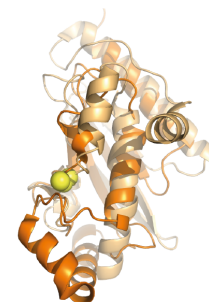

UBCH5C (1x23)

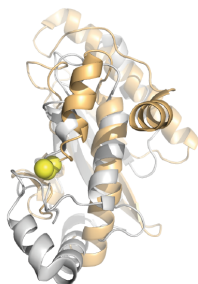

UBC13 (1j7d)

**Supplementary Figure 7: Superpositions of UFC1 with indicated E2 enzymes. The active site Cys is in yellow sphere. UFC1 is colored as in Fig.1C.**

$\alpha 2$                      $\alpha 3$                      $\alpha 4$   
                    

|                                                                                                                                                                                                                                                                                                                                 |                                                                                                                                                                                                                                                                                                                                                                                                                                                                                                                                                                                                                                                                                                                                                                                                                                                                                                                                                                                                                                                                                                                                                                                                                                                                                                                                                                                                                                                                                                                                                                                                                                                                                                                                                                                                |
|---------------------------------------------------------------------------------------------------------------------------------------------------------------------------------------------------------------------------------------------------------------------------------------------------------------------------------|------------------------------------------------------------------------------------------------------------------------------------------------------------------------------------------------------------------------------------------------------------------------------------------------------------------------------------------------------------------------------------------------------------------------------------------------------------------------------------------------------------------------------------------------------------------------------------------------------------------------------------------------------------------------------------------------------------------------------------------------------------------------------------------------------------------------------------------------------------------------------------------------------------------------------------------------------------------------------------------------------------------------------------------------------------------------------------------------------------------------------------------------------------------------------------------------------------------------------------------------------------------------------------------------------------------------------------------------------------------------------------------------------------------------------------------------------------------------------------------------------------------------------------------------------------------------------------------------------------------------------------------------------------------------------------------------------------------------------------------------------------------------------------------------|
| 3TGD_UBCH5B<br>1J7D_UBC13<br>1U9A_UBC9<br>1X23_UBCHC<br>1Y6L_UBE2E2<br>4Q5E_UBCH7<br>4Y1I_UBCH<br>1Y8X_UBC12<br>1W2W_UBCH8<br>6CYO_RAD6A<br>1FZY_UBC1<br>1YLA_UBE2K<br>2YBF_RAD6B<br>2C4F_UBCH5A<br>5LBN_UBCH6<br>3FN1_UBE2F<br>2CTX_UBE2G2<br>2Z5D_UBE2H<br>2F4N_UBE2J2<br>5BNB_UBE2S<br>1YH2_UBE2T<br>1YRV_UBE2U<br>2Z6F_UBC1 | 98 TISKVLLSI.CSLLCDFN.PDDPLVPEIARIYKT...DREKYN.....RIAREWTK.KYAM.....<br>100 QIRTVLLSI.QALLSAPN.PDDPLANDVAEQWKT...NEAQAI.....ETARAWTR.LYAMNNI.....<br>108 TIKQILLGI.QELLNFPN.IQDPAQAEAYTIYCO...NRVE.....YEKRVRAQAK.KFAPS.....<br>98 TISKVLLSI.CSLLCDFN.PDDPLVPEIARIYKT...DRDKYN.....RISREWTK.KYAM.....<br>155 TISKVLLSI.CSLLTDCN.PADPLVGSITATQYMT...NRAEHD.....RMAEQWTK.RYAT.....<br>100 KTDQVIQSL.IALVNDPQ.PEHLRADLAEEYSK...DRKKFS.....KNAEEFK.KYGKRPVD.....<br>127 DVRTILLSI.QSLLGEPN.IDSPLNTHAAELWKN...PAFKKY...LQETYSKQVTSQEP.....<br>124 TINSIINGL.QYIFLFP.NPBDLNKEAAEVLQN...NRRLF.....QNVORSMRGGYIGSTYF.ERCLK.....<br>100 KTCQVLEAL.NVLVNRFP.IREPLRMDLADLLTQ...NPELFR.....KNAEEFTL.RFGVDRPS.....<br>101 DVSSILTSI.QSLLDFPN.PNSPANSQAQLYQE...NKRE.....YEKRVSATIVE.QSWRDC.....<br>101 TLKSALISL.QALLQSPE.PNDPQDAEVAQHYLR...DRESFN.....KTALWTR.LYAS.....<br>105 TLRTVLLSL.QALLAAAE.PDDPQDAEVAQYKQ...NPEMFK.....QTARLWAH.VYAGAPVSSPEYTKKIENLCAMGFDRNAVIVALSSKSWDVETATELLLSG<br>101 DVSSILTSI.QSLLDFPN.PNSPANSQAQLYQE...NKRE.....YEKRVSATIVE.QSWNDS.....<br>98 TVSKVLLSI.CSLLCDFN.PDDPLVPDIAQIYKS...DREKYN.....RHAREWTK.KYAM.....<br>144 TISKVLLSI.CSLLTDCN.PADPLVGSITATQYMT...NRAEHD.....RMAEQWTK.RYAT.....<br>135 TLKDVVWGL.NSLFTDLL.NFDDPLNIEAAEHHLR...DKEDFR.....NKVDDYIK.....RYAR.....<br>115 SVEKILLSV.VSMLAEPN.DESGANVDASKMWRD...DREQF.....YKIRQIVQ.KSLGL.....<br>100 DLTNIFSFIPQLLAYFN.PIDPLNGDAAMYLIH...RPEEK.....OKIKEYIQ.KYATEEALKEQEEG.....<br>110 SVSTIITGL.LSFVMEKG.PTLGSI.EPSDFTKRQLAVQSLAFNLKDKVFCFLFPEVVEEIKQ.KOKAQ...DELSRRPQTLF.....<br>108 GIRHVLLTI.KMLLIHPN.PESALNEEAGRILLE...NYEAYA.....ARALLTE.IHG.....<br>103 NIATVLTSL.QLLMSEPN.PDDPLMADISSEPKY...NKPAFL.....KNARQWTE.KHARQKQADEEE.MLDNLP.....<br>104 TLSSILLAL.QVMLSNPV.LENPNLEAARILVK...DESLYR.....TILRLFNRP..... |
|---------------------------------------------------------------------------------------------------------------------------------------------------------------------------------------------------------------------------------------------------------------------------------------------------------------------------------|------------------------------------------------------------------------------------------------------------------------------------------------------------------------------------------------------------------------------------------------------------------------------------------------------------------------------------------------------------------------------------------------------------------------------------------------------------------------------------------------------------------------------------------------------------------------------------------------------------------------------------------------------------------------------------------------------------------------------------------------------------------------------------------------------------------------------------------------------------------------------------------------------------------------------------------------------------------------------------------------------------------------------------------------------------------------------------------------------------------------------------------------------------------------------------------------------------------------------------------------------------------------------------------------------------------------------------------------------------------------------------------------------------------------------------------------------------------------------------------------------------------------------------------------------------------------------------------------------------------------------------------------------------------------------------------------------------------------------------------------------------------------------------------------|

$\alpha 2$   
                    

**Supplementary Figure 8: sequence alignment of E2 enzymes.** The secondary structural elements covering the region of helix 2 to the C-terminus are shown for the indicated E2s (top). The corresponding secondary element for that region in UFC1 is shown underneath the sequence alignment.

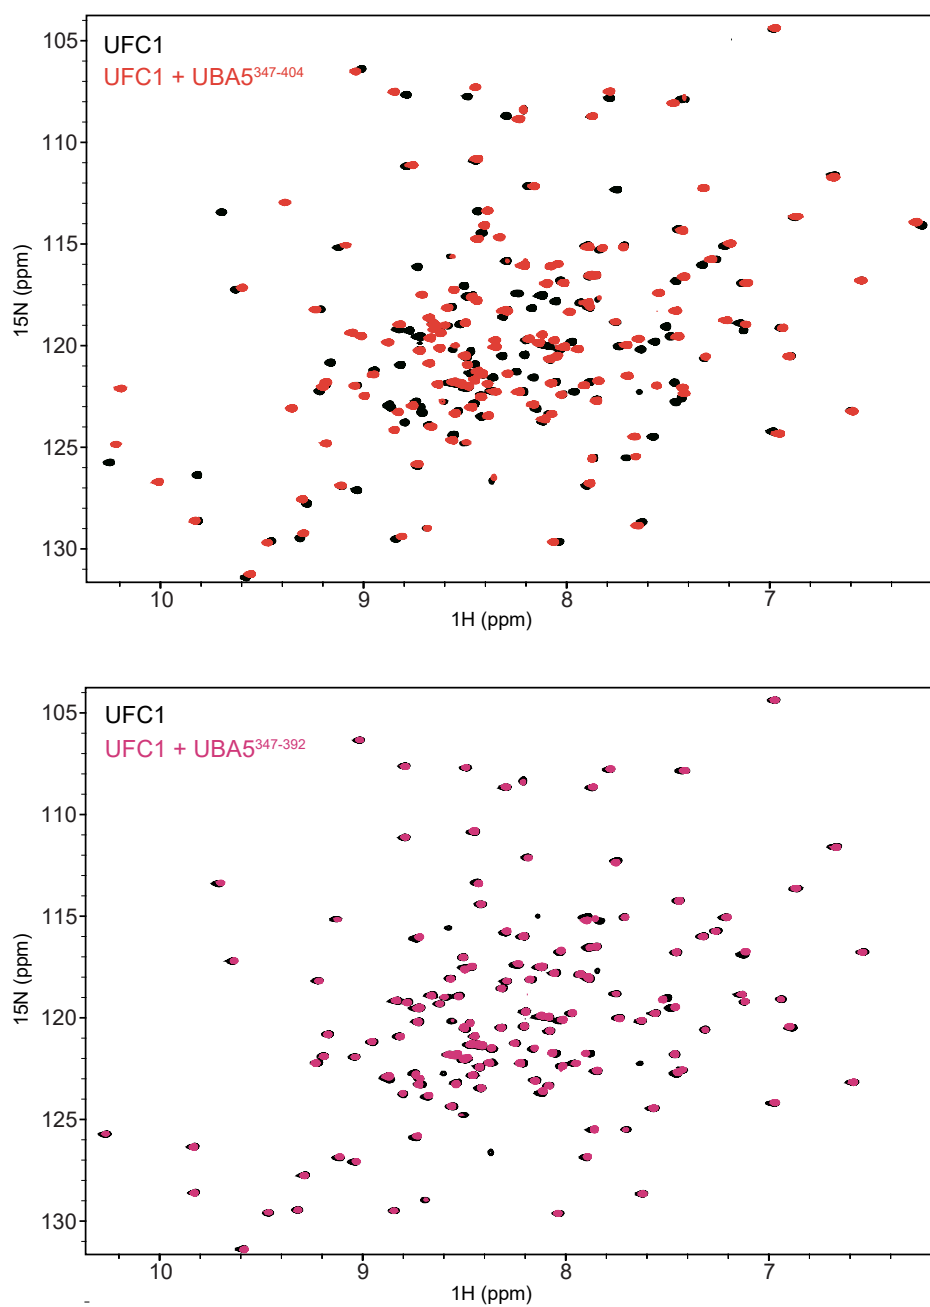

**Supplementary Figure 9:** Overlay of  $^1\text{H}$ - $^{15}\text{N}$  HSQC spectra of 0.2 mM UFC1 alone (black), and in the presence of equimolar concentration of UBA5<sup>347-404</sup> (red, upper panel) or five-fold excess of UBA5<sup>347-392</sup> (pink, bottom panel).

## Supplementary References

- 1 Tickle, I. Staraniso: Use of a WebGL-Based 3-D Interactive Graphical Display to Represent and Visualise Data Quality Metrics for Anisotropic Macromolecular Diffraction Data. *Acta Crystallogr A* **75**, E162-E162, doi:10.1107/S205327331909394x (2019).
- 2 Karplus, P. A. & Diederichs, K. Linking Crystallographic Model and Data Quality. *Science* **336**, 1030-1033, doi:10.1126/science.1218231 (2012).
- 3 Vaguine, A. A., Richelle, J. & Wodak, S. J. SFCHECK: a unified set of procedures for evaluating the quality of macromolecular structure-factor data and their agreement with the atomic model. *Acta Crystallogr D* **55**, 191-205, doi:Doi 10.1107/S0907444998006684 (1999).
- 4 Afonine, P. V. *et al.* Towards automated crystallographic structure refinement with phenix.refine. *Acta crystallographica. Section D, Biological crystallography* **68**, 352-367, doi:10.1107/S0907444912001308 (2012).
- 5 Potterton, L. *et al.* Developments in the CCP4 molecular-graphics project. *Acta crystallographica. Section D, Biological crystallography* **60**, 2288-2294, doi:10.1107/S0907444904023716 (2004).
